# Supplementary material for: Impact of epidemiological characteristics of supratentorial gliomas in adults brought about by the 2016 world health organization classification of tumors of the central nervous system
Source: PubMed Central journal article supplement (PMC5386767; doi:10.18632/oncotarget.13555), 2016-11-24
Supplement: oncotarget-08-20354-s001.pdf [file oncotarget-08-20354-s001.pdf]

# Impact of epidemiological characteristics of supratentorial gliomas in adults brought about by the 2016 world health organization classification of tumors of the central nervous system

## SUPPLEMENTARY FIGURES

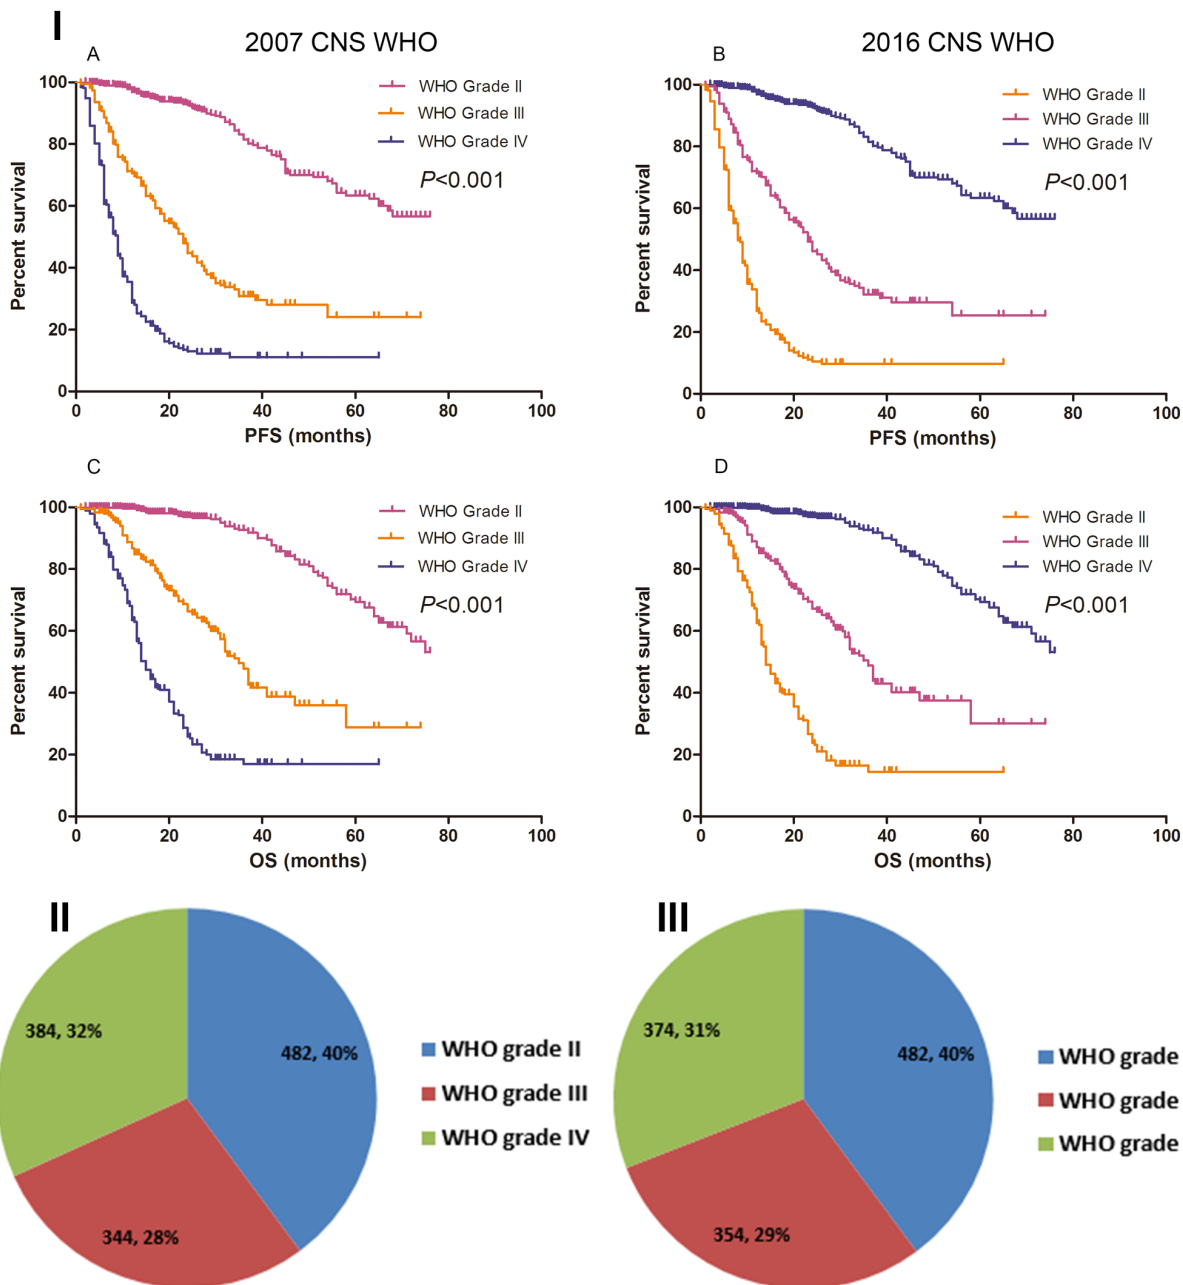

Supplementary Figure S1: The survival rate and specific distribution of different tumor grade in 2007/2016 CNS WHO.

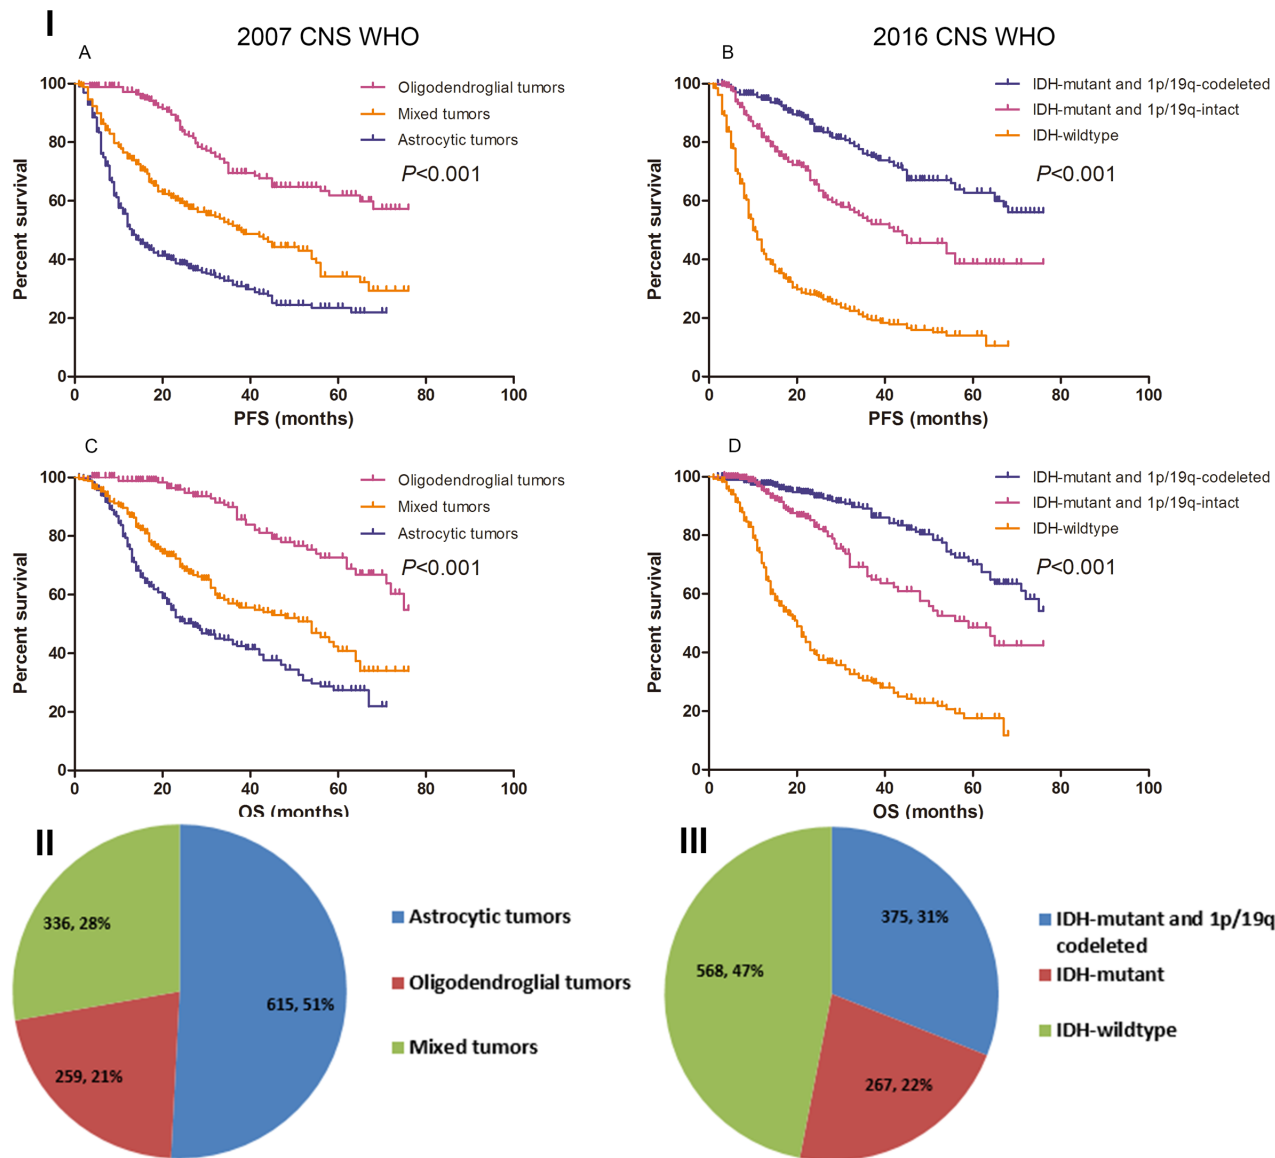

**Supplementary Figure S2: The survival rate and specific distribution of different subtypes in 2007/2016 CNS WHO.** In the 2007 CNS WHO, astrocytic tumors was the most common glioma in the brain, but conferring the shortest survival time. In the 2016 CNS WHO, gliomas with IDH-wildtype was the most common malignant neoplasm in the brain, conferring the shortest survival time.
